# Supplementary material for: Insight into TLR4 receptor inhibitory activity via QSAR for the treatment of Mycoplasma pneumonia disease
Source: Royal Society of Chemistry journal article supplement (doi:10.1039/d2ra06178c), 2023-01-01
Supplement: d2ra06178c1.xlsx [file d2ra06178c1.xlsx]

## Sheet: Lipinski_descr
ChEMBL ID	Canonical SMILES	MW	LogP	NumHDonors	NumHAcceptors	pIC50
CHEMBL382272	CCCCCCCCCCCCCC(=O)N[C@H](COCC[C@@H](CCCCCCC)OC(=O)CCCCCCCCCCC)COP(=O)(O)OCCNC(=O)C(Cc1ccc(O)cc1)C(=O)O	955.265	11.6711	5	10	6.45593
CHEMBL200140	CCCCCCCCCCCCCC(=O)N[C@@H](COCC[C@@H](CCCCCCC)OC(=O)CCCCCCCCCCC)COP(=O)(O)OCCNC(=O)C(Cc1ccc(O)cc1)C(=O)O	955.265	11.6711	5	10	6.60206
CHEMBL200667	CCCCCCCCCCCCCC(=O)N[C@@H](COCC[C@H](CCCCCCC)OC(=O)CCCCCCCCCCC)COP(=O)(O)OCCNC(=O)C(Cc1ccc(O)cc1)C(=O)O	955.265	11.6711	5	10	7.09691
CHEMBL200398	CCCCCCCCCCCCCC(=O)N[C@H](COCC[C@H](CCCCCCC)OC(=O)CCCCCCCCCCC)COP(=O)(O)OCCNC(=O)C(Cc1ccc(O)cc1)C(=O)O	955.265	11.6711	5	10	6.79588
CHEMBL3989738	CC(C)CCCCC(=O)N[C@@H](CCN)C(=O)N[C@H](C(=O)N[C@@H](CCN)C(=O)N[C@H]1CCNC(=O)[C@H]([C@@H](C)O)NC(=O)[C@H](CCN)NC(=O)[C@H](CCN)NC(=O)[C@H](CC(C)C)NC(=O)[C@@H](Cc2ccccc2)NC(=O)[C@@H](CCN)NC1=O)[C@@H](C)O.CC[C@H](C)CCCCC(=O)N[C@@H](CCN)C(=O)N[C@H](C(=O)N[C@@H](CCN)C(=O)N[C@H]1CCNC(=O)[C@H]([C@@H](C)O)NC(=O)[C@H](CCN)NC(=O)[C@H](CCN)NC(=O)[C@H](CC(C)C)NC(=O)[C@@H](Cc2ccccc2)NC(=O)[C@@H](CCN)NC1=O)[C@@H…	2392.97	-10.8797	36	36	5.91009
CHEMBL540367	CCCCCCCCCCCCCCOc1c(/C=N/N=C(N)N)ccc(/C=N/N=C(N)N)c1OCCCCCCCCCCCCCC.Cl.Cl	743.954	9.9046	4	6	3.72125
CHEMBL535384	CCCCCCCCOc1c(/C=N/N=C(N)N)ccc(/C=N/N=C(N)N)c1OCCCCCCCC.Cl.Cl	575.63	5.2234	4	6	5.34679
CHEMBL537642	CCCCCCOc1c(/C=N/N=C(N)N)ccc(/C=N/NC(=N)N)c1OCCCCCC.Cl.Cl	519.522	3.87267	5	6	5.21396
CHEMBL537866	CCCCCOc1c(/C=N/N=C(N)N)ccc(/C=N/N=C(N)N)c1OCCCCC.Cl.Cl	491.468	2.8828	4	6	4.97881
CHEMBL537865	CCCCOc1c(/C=N/N=C(N)N)ccc(/C=N/NC(=N)N)c1OCCCC.Cl.Cl	463.414	2.31227	5	6	5.02687
CHEMBL537645	C=CCOc1c(/C=N/NC(=N)N)ccc(/C=N/NC(=N)N)c1OCC=C.Cl.Cl	431.328	1.29374	6	6	4.21183
CHEMBL534488	CCCOc1c(/C=N/N=C(N)N)ccc(/C=N/N=C(N)N)c1OCCC.Cl.Cl	435.36	1.3224	4	6	4.55909
CHEMBL538329	CCOc1c(/C=N/N=C(N)N)ccc(/C=N/N=C(N)N)c1OCC.Cl.Cl	407.306	0.5422	4	6	4.44855
CHEMBL534490	COc1c(/C=N/N=C(N)N)ccc(/C=N/NC(=N)N)c1OC.Cl.Cl	379.252	-0.02833	5	6	3.75696
CHEMBL535159	Cl.Cl.N=C(N)N/N=C/c1ccc(/C=N/NC(=N)N)c(O)c1O	351.198	-0.42466	8	6	4.22841
CHEMBL534939	Cl.Cl.N=C(N)N/N=C/c1ccc(/C=N/NC(=N)N)cc1	319.2	0.16414	6	4	3.78516
CHEMBL505526	CCCCCCCCCCC[C@H](CC(=O)N[C@@H](CO[C@@H]1O[C@H](CO)[C@@H](OP(=O)(O)O)[C@H](OC(=O)C[C@@H](CCCCCCCCCCC)OC(=O)CCCCC)[C@H]1NC(=O)C[C@@H](CCCCCCCCCCC)OC(=O)CCCCC)C(=O)O)OC(=O)CCCCC	1319.74	14.5734	6	16	8.61979
CHEMBL501231	CCCCCCCCCCC[C@H](CC(=O)N[C@@H](CO[C@@H]1O[C@H](CO)[C@@H](OP(=O)(O)O)[C@H](OC(=O)C[C@@H](CCCCCCCCCCC)OCCCCCC)[C@H]1NC(=O)C[C@@H](CCCCCCCCCCC)OCCCCCC)C(=O)O)OCCCCCC	1277.79	15.9936	6	13	8.27572
CHEMBL224563	CCOC(=O)C1=CCCCC1S(=O)(=O)Nc1ccc(Cl)cc1F	361.822	3.2628	1	4	6.79588
CHEMBL2364541	CCCCCC/C=C\CCCCCCCCCC(=O)N[C@H]1[C@H](OC[C@H]2O[C@H](OP(=O)([O-])[O-])[C@H](NC(=O)CC(=O)CCCCCCCCCCC)[C@@H](OCCCCCCCCCC)[C@@H]2O)O[C@H](OC)[C@@H](OP(=O)([O-])[O-])[C@@H]1OCC[C@@H](CCCCCCC)OC.[Na+].[Na+].[Na+].[Na+]	1387.58	-0.9433	3	19	8.82391
CHEMBL458612	Nc1ccccc1Oc1ccc2c(N)nsc2c1	257.318	3.253	2	5	5.1549
CHEMBL387665	CCOC(=O)c1ccccc1S(=O)(=O)Nc1ccc(F)cc1Cl	357.79	3.4566	1	4	5
CHEMBL375048	CCOC(=O)C1=CCCCCC1S(=O)(=O)Nc1ccc(F)cc1Cl	375.849	3.6529	1	4	6.61979
CHEMBL224199	CCOC(=O)C1=CCCC1S(=O)(=O)Nc1ccc(F)cc1Cl	347.795	2.8727	1	4	6.95861
CHEMBL499811	CCOC(=O)C1=CCCCC1S(=O)(=O)NC1=NCCS1	318.42	1.0506	1	6	5
CHEMBL426184	CCOC(=O)C1=CCCCC1S(=O)(=O)Nc1ccc(F)cc1Cl	361.822	3.2628	1	4	8.49485
CHEMBL1223751	CCOc1ccc(OCC(O)CN(C)Cc2c(C)nn(Cc3ccccc3Cl)c2C)cc1	458.002	4.47204	1	6	3.95664
CHEMBL3087261	CN(CC(=O)Nc1ccc(N2CCOCC2)cc1)Cc1nc2scc(-c3ccccc3)c2c(=O)[nH]1	489.601	3.5587	2	7	3.77599
CHEMBL3087262	Cc1ccccc1Nc1nc(N)nc(CN2CCC[C@@H]2c2nc3ccccc3s2)n1	417.542	4.45262	2	8	4.19314
CHEMBL3087263	COc1ccc(O)c(C(=O)c2cnc(/N=C(\N)Nc3ccc(F)cc3)nc2)c1	381.367	2.6192	3	6	4.77989
CHEMBL3360816	CCCCCC(=O)O[C@@H]1[C@@H](CSCCNC(=S)NCCN(CCN)CCN)O[C@H](OC)[C@H](OC(=O)CCCCC)[C@H]1OC(=O)CCCCC.Cl	772.516	3.6725	4	13	5.4318
CHEMBL3360819	CCCCCC(=O)O[C@@H]1[C@@H](CSCCN)O[C@H](O[C@H]2O[C@H](CSCCN)[C@@H](OC(=O)CCCCC)[C@H](OC(=O)CCCCC)[C@H]2OC(=O)CCCCC)[C@@H](OC(=O)CCCCC)[C@H]1OC(=O)CCCCC.Cl	1085.9	9.211	2	19	5.88606
CHEMBL3360820	CCCCCC(=O)O[C@H]1[C@@H](OC(=O)CCCCC)[C@H](OC(=O)CCCCC)[C@@H](Cn2cc(CNC(=S)NCCN)nn2)O[C@@H]1O[C@H]1O[C@H](Cn2cc(CNC(=S)NCCN)nn2)[C@@H](OC(=O)CCCCC)[C@H](OC(=O)CCCCC)[C@H]1OC(=O)CCCCC.Cl	1332.14	6.2562	6	25	5.30103
CHEMBL3360821	CCCCCC(=O)O[C@H]1[C@@H](OC(=O)CCCCC)[C@H](OC(=O)CCCCC)[C@@H](Cn2cc(CN(CCN)CCN)nn2)O[C@@H]1O[C@H]1O[C@H](Cn2cc(CN(CCN)CCN)nn2)[C@@H](OC(=O)CCCCC)[C@H](OC(=O)CCCCC)[C@H]1OC(=O)CCCCC.Cl	1300.09	5.8494	4	27	6.22185
CHEMBL4100044	CCCCCCCCCCCCCC(=O)N[C@H]1[C@@H](OP(=O)(O)O)O[C@H](CO)[C@@H](OP(=O)(O)O)[C@@H]1OC(=O)CCCCCCCCCCCCC	759.852	7.0896	6	9	5.69897
CHEMBL4070714	CCCCCCCCCCCC(=O)N[C@H]1[C@@H](OP(=O)([O-])O)O[C@H](CO)[C@@H](OP(=O)([O-])O)[C@@H]1OC(=O)CCCCCCCCCCC.[Na+].[Na+]	747.708	-1.7268	4	11	6.20066
CHEMBL4069693	CCCCCCCCCC(=O)N[C@H]1[C@@H](OP(=O)([O-])O)O[C@H](CO)[C@@H](OP(=O)([O-])O)[C@@H]1OC(=O)CCCCCCCCC.[Na+].[Na+]	691.6	-3.2872	4	11	5.2636
CHEMBL4170576	Cc1nn(Cc2ccccc2Cl)c(C)c1CN(C)CC(O)CCOc1ccc(F)cc1	445.966	4.60254	1	5	4.25657
CHEMBL4163298	Cc1ccc(OCCC(O)CN(C)Cc2c(C)nn(Cc3ccccc3Cl)c2C)cc1	442.003	4.77186	1	5	4.28786
CHEMBL4174733	CCc1ccc(OCCC(O)CN(C)Cc2c(C)nn(Cc3ccccc3Cl)c2C)cc1	456.03	5.02584	1	5	4.58469
CHEMBL4171608	CCCc1ccc(OCCC(O)CN(C)Cc2c(C)nn(Cc3ccccc3Cl)c2C)cc1	470.057	5.41594	1	5	4.60765
CHEMBL4168989	Cc1nn(Cc2ccccc2Cl)c(C)c1CN(C)CC(O)CCOc1ccc(C(C)(C)C)cc1	484.084	5.76094	1	5	4.7778
CHEMBL4167187	CCOc1ccc(OCCC(O)CN(C)Cc2c(C)nn(Cc3ccccc3C)c2C)cc1	451.611	4.51716	1	6	4.26281
CHEMBL4164834	CCOc1ccc(OCCC(O)CN(C)Cc2c(C)nn(Cc3ccc(Cl)cc3)c2C)cc1	472.029	4.86214	1	6	4.58637
CHEMBL4175471	Cc1nn(Cc2ccccc2Cl)c(C)c1CN(C)CC(O)COc1cccc2[nH]c3ccccc3c12	503.046	5.70784	2	5	4.90483
CHEMBL4175587	Cc1nn(Cc2ccccc2Cl)c(C)c1CN(C)CC(O)CCOc1cccc2[nH]c3ccccc3c12	517.073	6.09794	2	5	4.82074
CHEMBL4176208	Cc1nn(Cc2ccccc2)c(C)c1CN(C)CC(O)COc1cccc2[nH]c3ccccc3c12	468.601	5.05444	2	5	4.50114
CHEMBL4163980	Cc1nn(Cc2ccc(Cl)cc2)c(C)c1CN(C)CC(O)COc1cccc2[nH]c3ccccc3c12	503.046	5.70784	2	5	4.86519
CHEMBL4174322	Cc1nn(Cc2ccccc2F)c(C)c1CN(C)CC(O)COc1cccc2[nH]c3ccccc3c12	486.591	5.19354	2	5	4.46042
CHEMBL723	COc1ccccc1OCCNCC(O)COc1cccc2[nH]c3ccccc3c12	406.482	3.738	3	5	4.49187
CHEMBL2440787	COc1ccccc1OCCNCC(O)CCOc1cccc2[nH]c3ccccc3c12	420.509	4.1281	3	5	4.48745
CHEMBL4161940	OC(CNc1ccc(-c2ccccc2)cc1)COc1cccc2[nH]c3ccccc3c12	408.501	5.8399	3	3	4.66334
CHEMBL4169865	OC(CNc1ccc2c(c1)-c1ccccc1C2)COc1cccc2[nH]c3ccccc3c12	420.512	5.7441	3	3	4.90693
CHEMBL4171849	O=C(c1ccccc1)c1cc(Cl)ccc1NCC(O)COc1cccc2[nH]c3ccccc3c12	470.956	6.0573	3	4	4.67531
CHEMBL4168489	OC(CNc1ccc2ccccc2c1)COc1cccc2[nH]c3ccccc3c12	382.463	5.3261	3	3	4.5447
CHEMBL4228510	COc1ccc(C/C(=N\O)c2nc3ccc(OC)cc3o2)cc1	312.325	3.266	1	6	6.26761
CHEMBL4228911	COc1ccc(C/C(=N\O)c2nc3ccc(Cl)cc3o2)cc1	316.744	3.9108	1	5	5.266
CHEMBL4227459	Cc1ccc2nc(/C(Cc3ccccc3)=N/O)oc2c1	266.3	3.55722	1	4	4.71557
CHEMBL4225876	Cc1ccc2oc(/C(Cc3ccc(F)cc3)=N/O)nc2c1	284.29	3.69632	1	4	4.34056
CHEMBL4229108	COc1ccccc1C(=O)O/N=C(\C)c1nc2ccccc2o1	310.309	3.4174	0	6	4.5867
CHEMBL225157	CCOC(=O)C1=CCCC[C@H]1S(=O)(=O)Nc1ccc(F)cc1Cl	361.822	3.2628	1	4	6.16749
CHEMBL501259	CCCCCC/C=C\CCCCCCCCCC(=O)N[C@H]1[C@H](OC[C@H]2O[C@H](OP(=O)(O)O)[C@H](NC(=O)CC(=O)CCCCCCCCCCC)[C@@H](OCCCCCCCCCC)[C@@H]2O)O[C@H](COC)[C@@H](OP(=O)(O)O)[C@@H]1OCC[C@@H](CCCCCCC)OC	1313.68	13.6112	7	15	8.82391
CHEMBL4463337	CC[C@H](C)[C@H](NC(=O)[C@H](Cc1c[nH]c2ccccc12)NC(=O)[C@H](Cc1c[nH]c2ccccc12)NC(=O)[C@H](CO)NC(=O)[C@H](CO)NC(=O)[C@H](Cc1ccccc1)NC(=O)[C@@H](NC(=O)CNC(=O)[C@@H](N)CC(C)C)C(C)C)C(=O)N[C@@H](CCCCN)C(=O)N[C@@H](CC(C)C)C(=O)N[C@H](C(=O)O)C(C)C	1434.75	0.6171	18	16	4.39794
CHEMBL4436411	CC[C@H](C)[C@@H]1NC(=O)[C@H](Cc2c[nH]c3ccccc23)NC(=O)[C@H](Cc2c[nH]c3ccccc23)NC(=O)[C@@H](NC(=O)[C@H](CO)NC(=O)[C@H](Cc2ccccc2)NC(=O)[C@@H](NC(=O)CNC(=O)[C@@H](N)CC(C)C)C(C)C)CC(=O)NCCCC[C@@H](C(=O)N[C@@H](CC(C)C)C(=O)N[C@H](C(=O)O)C(C)C)NC1=O	1444.74	1.186	17	15	4.60206
CHEMBL4514780	CC(C)(C)S(=O)(=O)c1cc2c(Nc3ccc4scnc4c3)ncnc2cc1OCCO	458.565	3.9264	2	9	5
CHEMBL4568204	CCOC(=O)C1=CCCCC1S(=O)(=O)N(C(=O)OCc1ccc([N+](=O)[O-])cc1)c1ccc(F)cc1Cl	540.953	4.9023	0	8	5.56848
CHEMBL4538376	CCOC(=O)C1=CCCCC1S(=O)(=O)N(Cc1ccc([N+](=O)[O-])cc1)c1ccc(F)cc1Cl	496.944	4.7657	0	6	5.74836
CHEMBL4450337	C#CCN(c1ccc(F)cc1Cl)S(=O)(=O)C1CCCC=C1C(=O)OCC	399.871	3.2905	0	4	6.47625
CHEMBL4436615	C#CCOC(=O)N(c1ccc(F)cc1Cl)S(=O)(=O)C1CCCC=C1C(=O)OCC	443.88	3.4271	0	6	5.40927
CHEMBL4646719	Cn1cc(-c2ccc3nc(N4CCN(C5CCC5)CC4)ncc3c2)ccc1=O	375.476	2.67	0	6	5.85387
CHEMBL4637821	Cc1cc(-c2ccc(=O)n(C)c2)cc2cnc(N3CCN(C(C)C)CC3)nc12	377.492	2.83432	0	6	5.22915
CHEMBL4639145	Cc1cc(-c2ccc(=O)n(C)c2)cc2cn(C3CCNCC3)nc12	322.412	2.63492	1	5	5.79588
CHEMBL4641633	O=c1ccc(-c2cc(C(F)(F)F)c3nn([C@H]4CCNC[C@@H]4F)cc3c2)c2n1CCC2	420.41	3.7025	1	5	5.18709
CHEMBL4643502	Cc1cc(-c2cc(C)c3nn(C4CCNCC4)cc3c2)cn(C)c1=O	336.439	2.94334	1	5	6.60206
CHEMBL4642538	Cc1cc(=O)n(C)cc1-c1cc(C)c2nn(C3CCNCC3)cc2c1	336.439	2.94334	1	5	5.37675
CHEMBL4641604	Cc1cc(-c2ccc(=O)n(C)c2C)cc2cn(C3CCNCC3)nc12	336.439	2.94334	1	5	5
CHEMBL4636498	CNCCN1CCC(c2ccc3[nH]c(-c4ccc(OC)c(OC)c4)c(C(C)C)c3c2)CC1	435.612	5.3743	2	4	4.82102
CHEMBL4647818	CNCCN1CCC(c2ccc3[nH]c(-c4ccc(OC)c(OC)c4)c(C)c3c2)CC1	407.558	4.55932	2	4	4.82478
