# Supplementary material for: Insight into TLR4 receptor inhibitory activity via QSAR for the treatment of Mycoplasma pneumonia disease
Source: Royal Society of Chemistry journal article supplement (doi:10.1039/d2ra06178c), 2023-01-01
Supplement: d2ra06178c2.csv [file d2ra06178c2.csv]

Feature	Importance
SHother	0.019862853
ATSC8m	0.017871312
BCUTc-1h	0.013745273
AATSC1p	0.012073853
maxHCsatu	0.010732084
MATS1m	0.010641959
AATSC8v	0.009744367
AATSC2e	0.009729119
ALogp2	0.00969068
MATS8v	0.009563457
piPC7	0.009381494
MATS1p	0.00937131
PubchemFP418	0.009053794
piPC8	0.008747733
FP253	0.008691793
ExtFP166	0.008417421
piPC9	0.008298001
GATS1s	0.007886246
ATSC1m	0.007867343
VR2_D	0.007822245
hmax	0.007758295
ALogP	0.007728365
FP587	0.007655342
ExtFP772	0.007402133
KRFPC297	0.007163692
ATSC8v	0.007141141
ExtFP271	0.00713352
MDEC-23	0.006957431
AATSC1m	0.006918686
piPC10	0.00665031
AATSC5e	0.006646215
ATSC4e	0.006481651
MATS8m	0.006332731
AATSC8i	0.00629875
R_TpiPCTPC	0.006282854
ExtFP385	0.00615233
RotBtFrac	0.006119419
ATSC0e	0.006030849
ATSC4c	0.005894697
JGI4	0.005833731
KRFPC3671	0.005807833
AATSC8m	0.005709251
ATSC8e	0.005689544
mindsCH	0.005679656
khs.ssCH2	0.005566116
piPC6	0.00552583
ATSC1p	0.005399893
MATS4e	0.005296839
KRFP3455	0.005274615
KRFPC3455	0.005254974
KRFP3671	0.005212731
MATS8p	0.005118997
nwHBa	0.005092601
ExtFP827	0.005066081
GATS3e	0.004942233
ExtFP633	0.004857758
GATS5s	0.004773406
FP546	0.004746046
ATSC5c	0.004744022
AATSC7e	0.004726129
AATSC8p	0.004667433
maxHBd	0.004554691
GATS1e	0.004531237
MDEO-11	0.004478344
MATS6c	0.004477239
piPC5	0.004451557
MATS4s	0.004408532
ExtFP310	0.00434378
BIC0	0.004304602
ExtFP576	0.004299902
AATS8p	0.004291651
SHCsatu	0.004283864
AATS8v	0.004212639
FP931	0.004183048
ATSC5e	0.004154488
RotBFrac	0.004137653
AATS8i	0.004051783
ATSC5i	0.003981523
MATS2e	0.00397711
nRotBt	0.003963312
FP342	0.003959039
AATSC2i	0.003946211
FP297	0.003933525
JGI3	0.003914483
MATS2i	0.003874314
C2SP3	0.003860601
ETA_EtaP_L	0.003858646
GATS4s	0.003846328
MATS7i	0.003840774
TpiPC	0.00380906
ATSC7e	0.003776476
minHCsatu	0.00376011
MATS1i	0.00372591
KRFPC341	0.003691896
KRFPC3692	0.003638874
AATSC4e	0.003638398
VR1_D	0.00363303
MATS5c	0.003629342
ATSC2e	0.003622106
ATSC1e	0.003588525
APC2D4_C_O	0.003584835
MATS7e	0.003571182
FP597	0.003542556
ATSC2v	0.003502908
MATS5e	0.003478721
MATS5s	0.00345496
GATS1p	0.00343768
WTPT-4	0.003430634
ExtFP984	0.003419531
ATSC5p	0.00340603
ExtFP724	0.003387596
minHBint7	0.003386253
CIC2	0.003378793
GATS3s	0.003349628
KRFP3721	0.003310795
XLogP	0.003269769
SIC0	0.00326488
ETA_BetaP	0.003246522
minHBd	0.003244485
MLFER_BH	0.003221047
MATS5i	0.003190973
FP129	0.003166246
SubFPC2	0.003160312
nssCH2	0.0031318
MDEO-12	0.003125674
piPC4	0.003113597
AATSC0i	0.003095253
MDEC-22	0.003087449
ATSC7i	0.003077278
SssCH2	0.003051176
BCUTp-1l	0.0030283
AMW	0.003019702
FP1015	0.003015023
AATSC7i	0.00299247
FP737	0.002971347
GATS4c	0.002953947
AATS6p	0.002850726
KRFPC3706	0.002844863
nHother	0.002841835
Kier3	0.002828192
SaaCH	0.002827015
AATSC5c	0.002819025
ZMIC1	0.002808411
MIC3	0.002776795
KRFPC3640	0.002729231
AATSC4c	0.002728093
SubFPC302	0.002711295
KRFPC3719	0.002680228
AATS0m	0.002635905
GATS7i	0.002627488
JGI2	0.002623657
ZMIC3	0.002619245
GGI2	0.002611184
ETA_EtaP	0.002594783
naasC	0.00258996
fragC	0.002581421
SIC2	0.00257402
BIC3	0.002569422
MATS4c	0.00251436
KRFPC3712	0.002514104
AATS5p	0.002510757
BIC2	0.00250314
ExtFP93	0.002462544
gmax	0.002440453
ExtFP447	0.00241168
AATSC1v	0.002405958
MPC9	0.002386926
AATS4p	0.002382426
AATS4m	0.002369668
APC2D9_O_O	0.002368348
ZMIC2	0.002341239
ETA_Eta_F	0.002324329
ATSC1v	0.00231575
ExtFP81	0.00231085
FP457	0.002305387
APC2D7_C_N	0.002291702
HybRatio	0.002282943
GATS4p	0.002262862
KRFPC3440	0.002170806
ATSC1i	0.002106419
SIC4	0.002081919
MATS4p	0.002078647
ATS4m	0.002069403
ZMIC4	0.002055444
APC2D5_C_N	0.002046041
ETA_Eta_L	0.002035867
piPC2	0.002032156
GATS1m	0.002030476
GraphFP202	0.002026034
JGT	0.001999887
WTPT-3	0.001993927
VR3_D	0.001953426
maxaaCH	0.001945553
FP344	0.001945224
nHCsats	0.001938134
ExtFP75	0.001928317
ETA_Shape_X	0.001895207
ndO	0.001864113
APC2D3_C_O	0.001864024
ATSC2i	0.0018314
SpDiam_D	0.00182493
AATSC0e	0.001822247
PubchemFP555	0.001818535
SpMAD_D	0.001817372
ATSC3v	0.001813092
ETA_Eta_B	0.001806342
MWC10	0.001805138
AATS0v	0.001793981
nH	0.001744024
AATS6v	0.001717755
AATS3m	0.001712922
maxdO	0.001712859
ExtFP561	0.001707008
nBondsS3	0.001704556
WPATH	0.001700652
ExtFP52	0.001688243
khs.aaCH	0.001666958
KRFPC2975	0.001665219
APC2D9_C_C	0.001625778
nHCsatu	0.00161621
nO	0.001595798
ATS0v	0.001568185
KRFPC3701	0.001562217
AATS2m	0.001555032
nN.1	0.001543971
ATS0m	0.001541696
VR1_Dt	0.00151949
MACCSFP117	0.001518938
ETA_Eta	0.001499722
SpAD_D	0.001492914
KRFP3701	0.001491332
ATS4v	0.001490325
ExtFP351	0.001480736
FP873	0.001473826
MPC6	0.001469665
McGowan_Volume	0.001452156
ATS8m	0.001451361
nAromBond	0.001441402
ExtFP196	0.001438557
APC2D5_C_O	0.001414356
FP444	0.001401869
GraphFP381	0.001397205
KRFPC344	0.00139096
apol	0.001384072
Spe	0.001382633
FP595	0.001370485
AATS4v	0.001364343
khs.dO	0.001359135
MWC4	0.001340161
KRFP3789	0.001334856
APC2D4_C_C	0.001331801
ExtFP920	0.001310539
ATS2m	0.001307991
APC2D4_O_O	0.001306916
GGI10	0.001288994
naAromAtom	0.001275325
ATS4i	0.001252916
GGI1	0.001247259
GraphFP396	0.001217203
FP493	0.001202591
ATS8p	0.001202425
nBondsS	0.001168206
ATS8v	0.001167373
KRFPC3957	0.001165128
ATS2e	0.001115351
ZMIC0	0.001114375
Sv	0.001098344
ETA_BetaP_ns_d	0.001091113
KRFPC3709	0.001087796
ATS0e	0.00105804
ETA_Eta_R	0.001054715
APC2D1_C_O	0.001046103
PubchemFP604	0.001011582
MW	0.001006805
PubchemFP626	0.001001119
KRFPC1193	0.000988727
AD2D92	0.000932079
PubchemFP535	0.000904964
KRFP3708	0.0008682
APC2D7_C_O	0.00085088
MACCSFP154	0.000820145
PubchemFP420	0.000785839
PubchemFP20	0.00070033
PubchemFP565	0.000698465
ExtFP679	0.000672368
KRFP3025	0.000612295
ExtFP606	0.000606949
PubchemFP443	0.000602611
KRFPC4331	0.000581029
ExtFP308	0.000580729
PubchemFP651	0.000556146
KRFP1193	0.000504707
KRFP3727	0.000464341
PubchemFP382	0.000374319
FP438	0.000363679
FP87	0.000339749
PubchemFP498	0.000296937
FP419	0.000289961
FP239	0.000175914
SubFPC18	0.000106341
