# Supplementary material for: Insight into TLR4 receptor inhibitory activity via QSAR for the treatment of Mycoplasma pneumonia disease
Source: Royal Society of Chemistry journal article supplement (doi:10.1039/d2ra06178c), 2023-01-01
Supplement: d2ra06178c3.pdf [file d2ra06178c3.pdf]

## Insight into TLR4 receptor inhibitory activity via QSAR for the treatment of *Mycoplasma pneumoniae* disease

Zemin Zhu<sup>1</sup>, Ziaur Rahman<sup>1</sup>, Muhammad Aamir<sup>1</sup>, Syed Zahid Ali Shah<sup>2</sup>, Sattar Hamid<sup>2</sup>, Akhunzada Bilawal<sup>3</sup>, Sihong Li<sup>4</sup>, Muhammad Ishfaq<sup>1, \*</sup>

<sup>1</sup> College of Computer Science, Huanggang Normal University, Huanggang 438000, China.

<sup>2</sup> University of Agriculture Peshawar, Khyber Pakhtunkhwa 25130, Pakistan.

<sup>3</sup> College of Food Science, Northeast Agricultural University, Harbin, China.

<sup>4</sup> Key Laboratory of Applied Technology on Green-Eco-Healthy Animal Husbandry of Zhejiang Province, College of Animal Science and Technology, College of Veterinary Medicine, Zhejiang A&F University, Hangzhou 311300, China.

\* Correspondence: muhammad@hgnu.edu.cn (M.I.); Tel.: +86 15972855212

### Supplementary materials

The supplementary materials S1 and S2 are as follows. Please double click on the file and it will open.

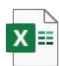

Supplementary file  
S1.xlsx

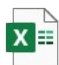

Supplementary file  
S2 .xlsx
